# Supplementary material for: Identification of fibroblast activation-related genes in two acute kidney injury models
Source: PeerJ. 2021 Mar 18;9:e10926. doi: 10.7717/peerj.10926 (PMC7982076; doi:10.7717/peerj.10926)
Supplement: Supplemental Information 1 [file peerj-09-10926-s001.xlsx]

## Sheet: 所有差异基因的副本
Category	Term	Count	%	PValue	Genes	List Total	Pop Hits	Pop Total	Fold Enrichment	Bonferroni	Benjamini	FDR
GOTERM_BP_DIRECT	GO:0055114~oxidation-reduction process	43	9.61969	3.74494e-09	ALDH8A1, HSD3B2, CYP2J5, LDHB, SORD, ADHFE1, IFI30, AASS, PAH, PIPOX, MTHFD1, ALDH1A2, PTGIS, PLOD1, HMOX1, CH25H, MIOX, HAAO, BDH2, DAO, LOX, LOXL1, HPD, DHCR24, NOX4, ALDH6A1, PTGR1, HGD, AKR1C21, CDO1, CRYZ, PHYH, POR, CYP4B1, IYD, KDM2B, L2HGDH, RRM2, HAO2, HSD11B1, CYP2D26, HSD11B2, DIO1	412	676	18082	2.79171	7.08166e-06	7.08166e-06	6.39662e-06
GOTERM_BP_DIRECT	GO:0008152~metabolic process	34	7.60626	7.32277e-09	ALDH8A1, HSD3B2, GLB1L, PGAM2, ECHDC2, AASS, PAH, ACAT1, UGT3A1, UGT3A2, FAHD1, MTHFD1, ALDH1A2, MUT, ACSL1, OXCT1, ACAA1B, PAPSS2, ALDH6A1, LYZ2, LYZ1, GSTA4, ACY3, KL, PM20D1, FBP1, METTL7B, AADAC, ACSM2, ACSM1, FOLH1, UGT2B34, SLC27A2, ACSM5	412	463	18082	3.2229	1.38473e-05	6.92365e-06	1.25078e-05
GOTERM_BP_DIRECT	GO:0015701~bicarbonate transport	6	1.34228	0.000113295	SLC26A4, PTGER3, SLC4A1, SLC4A4, CAR4, SLC26A1	412	22	18082	11.9695	0.192856	0.0689269	0.193339
GOTERM_BP_DIRECT	GO:0007155~cell adhesion	26	5.81655	0.000128905	ATP1B1, ITGB5, POSTN, ISLR, IGSF11, CGREF1, TGFBI, ITGB6, COL6A2, COL6A1, SPON1, B4GALT1, COL4A3, SVEP1, PTPRF, COL15A1, FBLIM1, CELSR2, TINAG, COL5A1, EMILIN1, LAMA2, COL14A1, CDH16, SRPX2, VCAN	412	485	18082	2.35278	0.216337	0.059124	0.219951
GOTERM_BP_DIRECT	GO:0006885~regulation of pH	6	1.34228	0.000316307	SLC26A4, RHCG, CAR12, SLC4A4, CAR4, CAR2	412	27	18082	9.75297	0.450217	0.112766	0.538902
GOTERM_BP_DIRECT	GO:0006814~sodium ion transport	11	2.46085	0.000538389	SLC5A2, ATP1B1, SLC12A1, SLC17A3, SLC12A3, SLC5A1, SLC17A1, SLC34A1, SLC13A1, SLC4A4, SLC5A12	412	124	18082	3.89332	0.638816	0.156106	0.915635
GOTERM_BP_DIRECT	GO:0009725~response to hormone	7	1.566	0.000727771	SORD, OXCT1, MMP19, LOX, ACAT1, DHCR24, TIMP1	412	48	18082	6.40038	0.747594	0.178541	1.23584
GOTERM_BP_DIRECT	GO:0015695~organic cation transport	4	0.894855	0.000884308	RHCG, SLC47A1, SLC22A2, SLC22A1	412	9	18082	19.5059	0.81231	0.188703	1.49977
GOTERM_BP_DIRECT	GO:0010043~response to zinc ion	6	1.34228	0.00109575	KHK, CRIP1, GSTA4, ALDOB, HAAO, CAR2	412	35	18082	7.52372	0.874216	0.205748	1.85521
GOTERM_BP_DIRECT	GO:0030198~extracellular matrix organization	10	2.23714	0.00117564	LAMA2, B4GALT1, SMOC2, EGFLAM, ADAMTSL2, CRISPLD2, TGFBI, PDGFRA, POSTN, EMILIN1	412	114	18082	3.84986	0.891872	0.19944	1.9892
GOTERM_BP_DIRECT	GO:0030199~collagen fibril organization	6	1.34228	0.00180423	COL14A1, COL3A1, COL1A2, COL1A1, LOX, COL5A1	412	39	18082	6.75205	0.96712	0.266878	3.03745
GOTERM_BP_DIRECT	GO:0006811~ion transport	26	5.81655	0.00195281	KCNJ16, SLC5A2, KCNJ15, ATP1B1, CLCA1, SLC12A1, SLC12A3, SLC5A1, SLC22A8, SLC34A1, SLC26A1, SLCO2B1, FXYD5, KCNJ1, LCN2, SLC17A1, WNK4, SLC13A1, SLC4A1, SLC4A4, KCNQ1, SLC40A1, SLC22A2, SLC5A12, SLC22A1, KCNE4	412	584	18082	1.95393	0.975187	0.265107	3.28367
GOTERM_BP_DIRECT	GO:0060326~cell chemotaxis	8	1.78971	0.0019662	CXCL14, PDGFRA, CCL9, ARHGEF16, HGF, LPAR1, RHOG, CCL6	412	78	18082	4.50137	0.975808	0.248953	3.30583
GOTERM_BP_DIRECT	GO:0071347~cellular response to interleukin-1	8	1.78971	0.00227468	LCN2, CEBPB, PTGIS, CCL9, ADAMTS12, MYC, CCL6, PCK1	412	80	18082	4.38883	0.986517	0.264786	3.81505
GOTERM_BP_DIRECT	GO:0006094~gluconeogenesis	5	1.11857	0.00264555	G6PC, FBP1, PGAM2, PPARGC1A, PCK1	412	26	18082	8.44007	0.993325	0.283916	4.42394
GOTERM_BP_DIRECT	GO:0072221~metanephric distal convoluted tubule development	3	0.671141	0.003	PAX8, UMOD, CALB1	412	4	18082	32.9163	0.996592	0.298894	5.00245
GOTERM_BP_DIRECT	GO:0071356~cellular response to tumor necrosis factor	9	2.01342	0.00363062	LCN2, ACTR3, CCL9, POSTN, COL1A1, ADAMTS12, PPARGC1A, CCL6, PCK1	412	110	18082	3.59086	0.99897	0.332748	6.02359
GOTERM_BP_DIRECT	GO:0055085~transmembrane transport	18	4.02685	0.00422669	SLC16A14, SLC5A2, SLC12A1, SLC12A3, SLC5A1, SLC22A8, SLC26A1, SLC47A1, SLC26A4, SLC16A7, SLC25A24, SLC17A1, SLC2A2, SLC13A1, KCNQ1, SLC22A2, SLC5A12, SLC22A1	412	364	18082	2.1703	0.999668	0.359162	6.97927
GOTERM_BP_DIRECT	GO:0001649~osteoblast differentiation	9	2.01342	0.00427708	PENK, FGF9, COL6A1, CREB3L1, VCAN, COL1A1, TMEM119, TPM4, IGFBP5	412	113	18082	3.49553	0.999698	0.347272	7.05963
GOTERM_BP_DIRECT	GO:0006629~lipid metabolic process	21	4.69799	0.0043938	CUBN, HINT2, ECHDC2, ABHD3, AKR1C21, CHPT1, PCK1, ACSM2, ISYNA1, ACSM1, ACSL1, PTGIS, HNF4A, CH25H, HSD11B1, ELOVL7, PRKAA2, ACAA1B, SLC27A2, ACSM5, DHCR24	412	459	18082	2.00796	0.999758	0.34055	7.24555
GOTERM_BP_DIRECT	GO:0006637~acyl-CoA metabolic process	5	1.11857	0.00509282	ACSM2, ACSM1, HNF4A, ACSM5, ACOT3	412	31	18082	7.07877	0.999936	0.36857	8.35165
GOTERM_BP_DIRECT	GO:0001568~blood vessel development	7	1.566	0.0054902	ALDH1A2, CCM2, COL3A1, COL1A2, COL1A1, LOX, COL5A1	412	71	18082	4.32702	0.99997	0.376999	8.97489
GOTERM_BP_DIRECT	GO:0007568~aging	11	2.46085	0.00631454	NOX4, BAK1, LITAF, PENK, KL, IFI27L2A, COL3A1, PPARGC1A, IGFBP5, TIMP1, PCK1	412	173	18082	2.79059	0.999994	0.405962	10.2551
GOTERM_BP_DIRECT	GO:0006633~fatty acid biosynthetic process	7	1.566	0.00671091	ACSM2, ACSM1, PTGIS, CH25H, ELOVL7, PRKAA2, ACSM5	412	74	18082	4.1516	0.999997	0.411716	10.8646
GOTERM_BP_DIRECT	GO:0015697~quaternary ammonium group transport	3	0.671141	0.00727654	SLC22A8, SLC22A2, SLC22A1	412	6	18082	21.9442	0.999999	0.424439	11.7276
GOTERM_BP_DIRECT	GO:2000573~positive regulation of DNA biosynthetic process	4	0.894855	0.00737988	NOX4, HGF, EGF, MYC	412	18	18082	9.75297	0.999999	0.416514	11.8844
GOTERM_BP_DIRECT	GO:0051453~regulation of intracellular pH	5	1.11857	0.00789314	SLC26A4, SLC4A1, SLC4A4, SLC26A1, CAR2	412	35	18082	6.26976	1	0.425931	12.6594
GOTERM_BP_DIRECT	GO:0032355~response to estradiol	8	1.78971	0.00822554	ALDH1A2, PENK, SLC34A1, SPRR2F, POSTN, COL1A1, MYC, GJB2	412	101	18082	3.4763	1	0.427542	13.1579
GOTERM_BP_DIRECT	GO:0070208~protein heterotrimerization	4	0.894855	0.0086178	COL1A2, COL6A2, COL6A1, COL1A1	412	19	18082	9.23965	1	0.431285	13.7427
GOTERM_BP_DIRECT	GO:0071456~cellular response to hypoxia	8	1.78971	0.00911988	EIF4EBP1, CLCA1, PTGIS, HMOX1, NDRG1, PPARGC1A, CCNA2, PCK1	412	103	18082	3.4088	1	0.438697	14.4859
GOTERM_BP_DIRECT	GO:0006631~fatty acid metabolic process	10	2.23714	0.00945407	ACSM2, ACSM1, ACSL1, PTGIS, ECHDC2, ELOVL7, PRKAA2, ACAA1B, SLC27A2, ACSM5	412	156	18082	2.81336	1	0.439789	14.9772
GOTERM_BP_DIRECT	GO:0006559~L-phenylalanine catabolic process	3	0.671141	0.0100347	HGD, PAH, HPD	412	7	18082	18.8093	1	0.448979	15.8244
GOTERM_BP_DIRECT	GO:0042493~response to drug	16	3.57942	0.0111543	MYO6, SORD, LGALS1, EMX2, SLC34A1, PPARGC1A, POR, LCN2, BAK1, ACSL1, OXCT1, HSD11B2, CYP2D26, COL1A1, LOX, NNMT	412	339	18082	2.07143	1	0.474164	17.4357
GOTERM_BP_DIRECT	GO:0052696~flavonoid glucuronidation	4	0.894855	0.0114387	UGT2B38, UGT2B34, UGT3A1, UGT3A2	412	21	18082	8.35969	1	0.472635	17.8405
GOTERM_BP_DIRECT	GO:0009813~flavonoid biosynthetic process	4	0.894855	0.0114387	UGT2B38, UGT2B34, UGT3A1, UGT3A2	412	21	18082	8.35969	1	0.472635	17.8405
GOTERM_BP_DIRECT	GO:0008202~steroid metabolic process	7	1.566	0.0122023	G6PC, CUBN, CH25H, HSD11B1, PRKAA2, AKR1C21, DHCR24	412	84	18082	3.65736	1	0.484866	18.9177
GOTERM_BP_DIRECT	GO:0071560~cellular response to transforming growth factor beta stimulus	6	1.34228	0.0124291	NOX4, ACTR3, PENK, POSTN, COL1A1, PPARGC1A	412	61	18082	4.31689	1	0.481577	19.2351
GOTERM_BP_DIRECT	GO:0038063~collagen-activated tyrosine kinase receptor signaling pathway	3	0.671141	0.0131797	COL4A3, COL1A1, COL4A5	412	8	18082	16.4581	1	0.492403	20.2772
GOTERM_BP_DIRECT	GO:0015670~carbon dioxide transport	3	0.671141	0.0131797	CAR12, CAR4, CAR2	412	8	18082	16.4581	1	0.492403	20.2772
GOTERM_BP_DIRECT	GO:0046689~response to mercury ion	3	0.671141	0.0131797	GATM, SLC34A1, PGAM2	412	8	18082	16.4581	1	0.492403	20.2772
GOTERM_BP_DIRECT	GO:0006694~steroid biosynthetic process	6	1.34228	0.0132743	HSD3B2, CH25H, HINT2, PRKAA2, AKR1C21, DHCR24	412	62	18082	4.24726	1	0.485724	20.4077
GOTERM_BP_DIRECT	GO:0030574~collagen catabolic process	4	0.894855	0.0165571	CTSK, MMP19, CTSS, MMP3	412	24	18082	7.31472	1	0.554931	24.8117
GOTERM_BP_DIRECT	GO:0006000~fructose metabolic process	3	0.671141	0.0166927	KHK, ALDOB, FBP1	412	9	18082	14.6294	1	0.548783	24.9885
GOTERM_BP_DIRECT	GO:0046415~urate metabolic process	3	0.671141	0.0166927	G6PC, SLC17A3, SLC17A1	412	9	18082	14.6294	1	0.548783	24.9885
GOTERM_BP_DIRECT	GO:0048839~inner ear development	6	1.34228	0.0170413	C1QB, CCM2, MYO6, CXCL14, MYO7A, KCNQ1	412	66	18082	3.98985	1	0.547402	25.4414
GOTERM_BP_DIRECT	GO:0006635~fatty acid beta-oxidation	5	1.11857	0.017454	ECHDC2, BDH2, ACAT1, ACAA1B, SLC27A2	412	44	18082	4.98731	1	0.547417	25.9744
GOTERM_BP_DIRECT	GO:0005975~carbohydrate metabolic process	11	2.46085	0.0197191	KHK, B4GALT1, LDHB, GLB1L, KL, PPP1R1A, MGAM, CHST14, FBP1, STBD1, XYLB	412	206	18082	2.34355	1	0.58349	28.8358
GOTERM_BP_DIRECT	GO:0031145~anaphase-promoting complex-dependent catabolic process	3	0.671141	0.0205553	1500015O10RIK, CDC20, UBE2C	412	10	18082	13.1665	1	0.590417	29.8656
GOTERM_BP_DIRECT	GO:0010107~potassium ion import	4	0.894855	0.0205726	KCNJ16, KCNJ15, ATP1B1, KCNJ1	412	26	18082	6.75205	1	0.582522	29.8868
GOTERM_BP_DIRECT	GO:0002281~macrophage activation involved in immune response	3	0.671141	0.02475	LBP, IL33, TYROBP	412	11	18082	11.9695	1	0.64308	34.8232
GOTERM_BP_DIRECT	GO:0032060~bleb assembly	3	0.671141	0.02475	LPAR1, EMP3, EMP1	412	11	18082	11.9695	1	0.64308	34.8232
GOTERM_BP_DIRECT	GO:0043206~extracellular fibril organization	3	0.671141	0.02475	COL3A1, MFAP5, COL5A1	412	11	18082	11.9695	1	0.64308	34.8232
GOTERM_BP_DIRECT	GO:0014823~response to activity	5	1.11857	0.0249505	OXCT1, PRKAA2, SLC4A1, PPARGC1A, PCK1	412	49	18082	4.4784	1	0.638176	35.0517
GOTERM_BP_DIRECT	GO:0007584~response to nutrient	6	1.34228	0.025216	ACSL1, CUBN, GATM, OXCT1, SLC6A19, POR	412	73	18082	3.60726	1	0.634375	35.3531
GOTERM_BP_DIRECT	GO:0071320~cellular response to cAMP	5	1.11857	0.0266491	NOX4, PENK, KCNQ1, IGFBP5, PCK1	412	50	18082	4.38883	1	0.647389	36.9574
GOTERM_BP_DIRECT	GO:0006730~one-carbon metabolic process	4	0.894855	0.0327387	MTHFD1, CAR12, CAR4, CAR2	412	31	18082	5.66301	1	0.716033	43.3658
GOTERM_BP_DIRECT	GO:0006821~chloride transport	6	1.34228	0.0355536	SLC12A1, CLCA1, SLC12A3, WNK4, SLC4A1, SLC26A1	412	80	18082	3.29163	1	0.73875	46.1161
GOTERM_BP_DIRECT	GO:0071230~cellular response to amino acid stimulus	8	1.78971	0.0371271	CEBPB, COL3A1, COL1A2, PDGFRA, COL6A1, COL1A1, RRAGD, MMP3	412	137	18082	2.56282	1	0.747374	47.5982
GOTERM_BP_DIRECT	GO:0031100~organ regeneration	5	1.11857	0.0382721	BAK1, MKI67, HGF, CCNA2, NNMT	412	56	18082	3.9186	1	0.751506	48.6524
GOTERM_BP_DIRECT	GO:0015804~neutral amino acid transport	3	0.671141	0.0391593	SLC7A9, SLC6A19, SLC7A12	412	14	18082	9.40465	1	0.753124	49.4555
GOTERM_BP_DIRECT	GO:0008272~sulfate transport	3	0.671141	0.0391593	SLC26A4, SLC13A1, SLC26A1	412	14	18082	9.40465	1	0.753124	49.4555
GOTERM_BP_DIRECT	GO:0043588~skin development	5	1.11857	0.0426973	COL3A1, COL1A1, PTCH2, COL5A1, DHCR24	412	58	18082	3.78348	1	0.77693	52.5421
GOTERM_BP_DIRECT	GO:0006508~proteolysis	21	4.69799	0.0443125	HPN, CLCA1, PM20D1, MMP19, GGT1, CTSS, KLK1, ENPEP, HGF, CELA1, MMP23, MMP3, TMEM27, PROC, PRSS8, FOLH1, CTSK, MEP1A, ADAMTS12, HTRA3, ADAMTS4	412	582	18082	1.5836	1	0.783573	53.8914
GOTERM_BP_DIRECT	GO:0010812~negative regulation of cell-substrate adhesion	3	0.671141	0.0445179	LGALS1, TBCD, COL1A1	412	15	18082	8.77767	1	0.779263	54.0604
GOTERM_BP_DIRECT	GO:0097089~methyl-branched fatty acid metabolic process	2	0.447427	0.0449442	PHYH, SLC27A2	412	2	18082	43.8883	1	0.77671	54.4092
GOTERM_BP_DIRECT	GO:0060265~positive regulation of respiratory burst involved in inflammatory response	2	0.447427	0.0449442	RPS19, LBP	412	2	18082	43.8883	1	0.77671	54.4092
GOTERM_BP_DIRECT	GO:0071412~cellular response to genistein	2	0.447427	0.0449442	UGT3A1, UGT3A2	412	2	18082	43.8883	1	0.77671	54.4092
GOTERM_BP_DIRECT	GO:0020028~hemoglobin import	2	0.447427	0.0449442	CUBN, LRP2	412	2	18082	43.8883	1	0.77671	54.4092
GOTERM_BP_DIRECT	GO:0034769~basement membrane disassembly	2	0.447427	0.0449442	HPN, CTSS	412	2	18082	43.8883	1	0.77671	54.4092
GOTERM_BP_DIRECT	GO:0072233~metanephric thick ascending limb development	2	0.447427	0.0449442	POU3F3, UMOD	412	2	18082	43.8883	1	0.77671	54.4092
GOTERM_BP_DIRECT	GO:0030900~forebrain development	6	1.34228	0.0462265	ALDH1A2, KDM2B, EMX2, LRP2, PPARGC1A, DCLK1	412	86	18082	3.06198	1	0.780617	55.4435
GOTERM_BP_DIRECT	GO:0035725~sodium ion transmembrane transport	4	0.894855	0.0478932	SLC17A3, SLC12A3, SLC17A1, SLC13A1	412	36	18082	4.87648	1	0.787067	56.7549
GOTERM_BP_DIRECT	GO:0019369~arachidonic acid metabolic process	4	0.894855	0.0478932	CYP2J5, CYP2D12, CYP2J11, CYP2D26	412	36	18082	4.87648	1	0.787067	56.7549
GOTERM_BP_DIRECT	GO:0007346~regulation of mitotic cell cycle	4	0.894855	0.0512712	CKS1B, BIRC5, MYC, RPA3	412	37	18082	4.74469	1	0.804384	59.3022
GOTERM_BP_DIRECT	GO:0008219~cell death	4	0.894855	0.0512712	HMOX1, RGS19, EMP3, EMP1	412	37	18082	4.74469	1	0.804384	59.3022
GOTERM_BP_DIRECT	GO:0002526~acute inflammatory response	3	0.671141	0.0559794	B4GALT1, KL, DEFB1	412	17	18082	7.745	1	0.827442	62.6177
GOTERM_BP_DIRECT	GO:0019395~fatty acid oxidation	3	0.671141	0.0559794	HAO2, PPARGC1A, POR	412	17	18082	7.745	1	0.827442	62.6177
GOTERM_BP_DIRECT	GO:0048566~embryonic digestive tract development	3	0.671141	0.0620544	ALDH1A2, FGF9, PKDCC	412	18	18082	7.31472	1	0.85382	66.5208
GOTERM_BP_DIRECT	GO:0001676~long-chain fatty acid metabolic process	3	0.671141	0.0620544	ACSL1, SLC27A2, ACOT3	412	18	18082	7.31472	1	0.85382	66.5208
GOTERM_BP_DIRECT	GO:0050892~intestinal absorption	3	0.671141	0.0620544	VDR, SLC5A1, KCNQ1	412	18	18082	7.31472	1	0.85382	66.5208
GOTERM_BP_DIRECT	GO:0042060~wound healing	6	1.34228	0.063123	B4GALT1, COL3A1, PDGFRA, COL1A1, LOX, TIMP1	412	94	18082	2.80138	1	0.85435	67.1663
GOTERM_BP_DIRECT	GO:0030324~lung development	7	1.566	0.0638553	ALDH1A2, EIF4EBP1, FGF9, CRISPLD2, PDGFRA, HSD11B1, LOX	412	124	18082	2.47757	1	0.853344	67.602
GOTERM_BP_DIRECT	GO:0008283~cell proliferation	10	2.23714	0.064721	COL4A3, BAK1, CKS1B, MKI67, TGFBI, IRF2, HGF, ENPEP, LRP2, MYC	412	220	18082	1.99492	1	0.852965	68.1099
GOTERM_BP_DIRECT	GO:0043154~negative regulation of cysteine-type endopeptidase activity involved in apoptotic process	5	1.11857	0.0660078	INTS1, BIRC5, HGF, POR, DHCR24	412	67	18082	3.27525	1	0.854464	68.8511
GOTERM_BP_DIRECT	GO:0010046~response to mycotoxin	2	0.447427	0.0666548	LCN2, BAK1	412	3	18082	29.2589	1	0.853137	69.2176
GOTERM_BP_DIRECT	GO:0061625~glycolytic process through fructose-1-phosphate	2	0.447427	0.0666548	KHK, ALDOB	412	3	18082	29.2589	1	0.853137	69.2176
GOTERM_BP_DIRECT	GO:0030208~dermatan sulfate biosynthetic process	2	0.447427	0.0666548	CHST14, DSE	412	3	18082	29.2589	1	0.853137	69.2176
GOTERM_BP_DIRECT	GO:2000611~positive regulation of thyroid hormone generation	2	0.447427	0.0666548	HPN, PAX8	412	3	18082	29.2589	1	0.853137	69.2176
GOTERM_BP_DIRECT	GO:0061624~fructose catabolic process to hydroxyacetone phosphate and glyceraldehyde-3-phosphate	2	0.447427	0.0666548	KHK, ALDOB	412	3	18082	29.2589	1	0.853137	69.2176
GOTERM_BP_DIRECT	GO:0010248~establishment or maintenance of transmembrane electrochemical gradient	2	0.447427	0.0666548	BAK1, SLC22A1	412	3	18082	29.2589	1	0.853137	69.2176
GOTERM_BP_DIRECT	GO:1990845~adaptive thermogenesis	2	0.447427	0.0666548	PM20D1, PPARGC1A	412	3	18082	29.2589	1	0.853137	69.2176
GOTERM_BP_DIRECT	GO:0048878~chemical homeostasis	2	0.447427	0.0666548	SLC12A1, UMOD	412	3	18082	29.2589	1	0.853137	69.2176
GOTERM_BP_DIRECT	GO:0033512~L-lysine catabolic process to acetyl-CoA via saccharopine	2	0.447427	0.0666548	AADAT, AASS	412	3	18082	29.2589	1	0.853137	69.2176
GOTERM_BP_DIRECT	GO:1904640~response to methionine	2	0.447427	0.0666548	PPARGC1A, PCK1	412	3	18082	29.2589	1	0.853137	69.2176
GOTERM_BP_DIRECT	GO:0034395~regulation of transcription from RNA polymerase II promoter in response to iron	2	0.447427	0.0666548	HMOX1, SLC40A1	412	3	18082	29.2589	1	0.853137	69.2176
GOTERM_BP_DIRECT	GO:0098609~cell-cell adhesion	9	2.01342	0.0674564	EPCAM, COBLL1, RPS26, FMNL2, MYO6, CCNB2, ARHGEF16, NDRG1, ESYT2	412	189	18082	2.08992	1	0.852511	69.6661
GOTERM_BP_DIRECT	GO:0055072~iron ion homeostasis	4	0.894855	0.0698103	LCN2, HMOX1, BDH2, SLC40A1	412	42	18082	4.17984	1	0.858427	70.9477
GOTERM_BP_DIRECT	GO:0006865~amino acid transport	4	0.894855	0.0698103	SLC7A9, MYC, SLC6A19, SLC7A12	412	42	18082	4.17984	1	0.858427	70.9477
GOTERM_BP_DIRECT	GO:0006813~potassium ion transport	7	1.566	0.0699709	KCNJ16, KCNJ15, ATP1B1, SLC12A1, KCNQ1, KCNJ1, KCNE4	412	127	18082	2.41904	1	0.855142	71.0333
GOTERM_BP_DIRECT	GO:0006810~transport	52	11.6331	0.0702435	KCNJ16, SLC5A2, KCNJ15, SLC16A14, ATP1B1, SLC6A20B, AP2S1, SLC5A1, MYO7A, SLC7A9, SLC26A1, AQP3, RAB3IP, TTR, SLC25A24, SLC2A2, SLC4A1, LBP, SLC4A4, KCNQ1, SLC1A1, SLC22A2, SLC22A1, KDELR3, CLCA1, MYO6, SLC22A8, SLC34A1, PKDCC, ECT2, SLC26A4, RHCG, SLC40A1, ARFGAP1, SLC47A1, FXYD5, ESYT2, KCNJ1, FOLR1, ABCA13, KCNE4, SLC12A1, CUBN, SLC12A3, SLCO2B1, SLC6A19, LCN2, SLC16A7, SLC17A1, SLC13A1, PDZK1…	412	1822	18082	1.25258	1	0.852343	71.178
GOTERM_BP_DIRECT	GO:0046426~negative regulation of JAK-STAT cascade	4	0.894855	0.0738349	SOCS3, LRRC19, LEPROT, CISH	412	43	18082	4.08264	1	0.862882	73.0217
GOTERM_BP_DIRECT	GO:0030539~male genitalia development	3	0.671141	0.0748267	PDGFRA, GJB2, DHCR24	412	20	18082	6.58325	1	0.862955	73.5109
GOTERM_BP_DIRECT	GO:0001822~kidney development	7	1.566	0.0764132	ALDH1A2, SLC12A1, PKHD1, SLC34A1, POU3F3, CAR2, KCNJ1	412	130	18082	2.36322	1	0.865235	74.2762
GOTERM_BP_DIRECT	GO:0032868~response to insulin	5	1.11857	0.0781116	KHK, EGR2, HSD11B2, GCNT1, PCK1	412	71	18082	3.09073	1	0.867827	75.0723
GOTERM_BP_DIRECT	GO:0042472~inner ear morphogenesis	5	1.11857	0.0812994	MYO6, FGF9, MYO7A, PAX8, PRRX1	412	72	18082	3.0478	1	0.875373	76.5044
GOTERM_BP_DIRECT	GO:0006879~cellular iron ion homeostasis	4	0.894855	0.0821845	LCN2, HMOX1, MYC, SLC40A1	412	45	18082	3.90119	1	0.874958	76.888
GOTERM_BP_DIRECT	GO:1901857~positive regulation of cellular respiration	2	0.447427	0.087873	MYC, PPARGC1A	412	4	18082	21.9442	1	0.889375	79.2166
GOTERM_BP_DIRECT	GO:0070294~renal sodium ion absorption	2	0.447427	0.087873	WNK4, KCNJ1	412	4	18082	21.9442	1	0.889375	79.2166
GOTERM_BP_DIRECT	GO:0060058~positive regulation of apoptotic process involved in mammary gland involution	2	0.447427	0.087873	B4GALT1, VDR	412	4	18082	21.9442	1	0.889375	79.2166
GOTERM_BP_DIRECT	GO:0044752~response to human chorionic gonadotropin	2	0.447427	0.087873	MYC, GJB2	412	4	18082	21.9442	1	0.889375	79.2166
GOTERM_BP_DIRECT	GO:0046952~ketone body catabolic process	2	0.447427	0.087873	OXCT1, ACAT1	412	4	18082	21.9442	1	0.889375	79.2166
GOTERM_BP_DIRECT	GO:0009812~flavonoid metabolic process	2	0.447427	0.087873	MYC, POR	412	4	18082	21.9442	1	0.889375	79.2166
GOTERM_BP_DIRECT	GO:0072218~metanephric ascending thin limb development	2	0.447427	0.087873	POU3F3, UMOD	412	4	18082	21.9442	1	0.889375	79.2166
GOTERM_BP_DIRECT	GO:0071407~cellular response to organic cyclic compound	5	1.11857	0.0912404	TMEM173, CEBPB, LGALS1, RGS19, IGFBP5	412	75	18082	2.92589	1	0.895807	80.489
GOTERM_BP_DIRECT	GO:0014850~response to muscle activity	3	0.671141	0.0953574	POSTN, PRKAA2, PPARGC1A	412	23	18082	5.72457	1	0.903633	81.945
GOTERM_BP_DIRECT	GO:0023019~signal transduction involved in regulation of gene expression	3	0.671141	0.0953574	EPCAM, HNF4A, PDGFRA	412	23	18082	5.72457	1	0.903633	81.945
GOTERM_BP_DIRECT	GO:0001501~skeletal system development	6	1.34228	0.0970146	VDR, COL3A1, COL1A2, VCAN, PKDCC, COL1A1	412	107	18082	2.46103	1	0.904949	82.5017
GOTERM_CC_DIRECT	GO:0070062~extracellular exosome	142	31.7673	1.40541e-25	ALDH8A1, LDHB, ATP1B1, S100A6, PGAM2, RPLP2, GGT1, ENPEP, CALB1, TTR, OGN, NANS, PLOD1, PVALB, MIOX, TGFBI, SLC4A1, SLC4A4, BPNT1, ALDH6A1, MYO6, PTPRF, GATM, PCBD1, FBP1, COLEC12, TMEM27, PRELP, C1QB, CDKL1, RPS19, RHCG, TXNDC5, MGAM, COL1A2, CAR4, PKHD1, ALDOB, ITGB5, PAH, UMOD, ARPC4, ACAT1, TIMP1, RPS26, RPL7, FOLR1, ITGB6, NDRG1, EGF, DEFB1, SPP2, B4GALT1, PARD6B, PTGR1, CUBN, ACY3, CKAP4, L…	427	2674	19662	2.44527	4.32866e-23	4.32866e-23	1.88559e-22
GOTERM_CC_DIRECT	GO:0005578~proteinaceous extracellular matrix	36	8.05369	2.30037e-15	ADAMTSL2, COL3A1, POSTN, MMP3, TIMP1, OGN, SMOC2, CRISPLD2, COL6A3, TGFBI, COL6A2, COL6A1, ADAMTS12, LOX, LOXL1, SPON1, MATN2, COL4A4, COL4A3, LGALS1, CRTAP, MMP19, COL15A1, COL5A1, SLIT3, EMILIN1, PRELP, LAMA2, COL14A1, EGFLAM, COL1A2, MFAP2, VCAN, COL1A1, MFAP5, ADAMTS4	427	316	19662	5.24584	7.18092e-13	3.59046e-13	3.13083e-12
GOTERM_CC_DIRECT	GO:0016324~apical plasma membrane	34	7.60626	2.37747e-13	ATP1B1, SLC6A20B, PKHD1, SLC5A1, MYO7A, LMO7, SLC7A9, UMOD, ENPEP, EPCAM, FOLR1, SLC2A2, PRKAA2, SLC1A1, KCNE4, NOX4, PARD6B, HPN, CUBN, SLC12A1, ACY3, SLC12A3, KL, SLC34A1, BIRC5, SLCO2B1, SLC26A4, RHCG, SLC17A3, S100G, CAR4, LRP2, PDZK1, SLC5A12	427	328	19662	4.77315	7.32112e-11	2.44037e-11	3.18912e-10
GOTERM_CC_DIRECT	GO:0031526~brush border membrane	17	3.80313	1.51653e-12	B4GALT1, SLC5A2, PTGER3, CUBN, SLC6A20B, SLC5A1, SLC34A1, SLC7A9, SLC6A19, TMEM27, SLC26A4, SLC17A3, FOLR1, SLC2A2, CAR4, LRP2, PDZK1	427	70	19662	11.1828	4.67102e-10	1.16775e-10	2.03472e-09
GOTERM_CC_DIRECT	GO:0031012~extracellular matrix	31	6.93512	2.10137e-12	ADAMTSL2, VIM, COL3A1, POSTN, MMP23, MMP3, TIMP1, OGN, TGFBI, COL6A3, TUBB5, COL6A2, COL6A1, ADAMTS12, LOXL1, SPON1, MATN2, LGALS1, CKAP4, MMP19, COL15A1, RPS5, COL5A1, EMILIN1, PRELP, COL14A1, RPS19, COL1A2, VCAN, COL1A1, ADAMTS4	427	294	19662	4.85528	6.47206e-10	1.29441e-10	2.81927e-09
GOTERM_CC_DIRECT	GO:0005576~extracellular region	82	18.3445	4.23446e-11	GLB1L, WFDC15B, FGF9, POSTN, MMP3, OGN, TTR, CGREF1, TGFBI, LOX, HTRA3, LGI2, LBP, LOXL1, APOO, SPON1, MATN2, KNG1, CLCA1, MMP19, CRTAP, PKDCC, SLIT3, PRELP, PROC, C1QB, EGFLAM, COL1A2, VCAN, MFAP2, COL1A1, MFAP5, ADAMTS4, ADAMTSL2, CRLF2, COL3A1, CRLF1, 1500015O10RIK, CCL9, IFI30, UMOD, PF4, IL33, TIMP1, CCL6, F13B, PRSS8, ISLR, SMOC2, FOLR1, CRISPLD2, COL6A2, COL6A1, ADAMTS12, EGF, DEFB1, SPP2,…	427	1753	19662	2.15393	1.30421e-08	2.17369e-09	5.68122e-08
GOTERM_CC_DIRECT	GO:0005581~collagen trimer	16	3.57942	2.70193e-10	COL4A4, COL4A3, COL3A1, COL15A1, COLEC12, COL5A1, EMILIN1, COL4A5, C1QB, COL14A1, COL6A3, COL6A2, COL1A2, COL6A1, COL1A1, LOX	427	83	19662	8.8765	8.32193e-08	1.18885e-08	3.62508e-07
GOTERM_CC_DIRECT	GO:0016323~basolateral plasma membrane	20	4.47427	9.98075e-08	B4GALT1, KCNJ16, ATP1B1, SLC22A8, SLC34A1, UMOD, AQP3, EPCAM, RHCG, CDH16, FOLR1, SLC2A2, S100G, SLC4A1, SLC4A4, KCNQ1, SLC40A1, CAR2, SLC22A2, SLC22A1	427	203	19662	4.53663	3.07402e-05	3.84258e-06	0.000133908
GOTERM_CC_DIRECT	GO:0005604~basement membrane	14	3.13199	1.72933e-07	COL4A4, MATN2, COL4A3, FGF9, COL15A1, TINAG, COL5A1, TIMP1, COL4A5, LAMA2, SMOC2, EGFLAM, TGFBI, LOXL1	427	97	19662	6.64594	5.32618e-05	5.91812e-06	0.000232017
GOTERM_CC_DIRECT	GO:0016020~membrane	201	44.9664	7.35518e-07	RPL18, LDHB, S100A6, ATP1B1, RPL19, RPLP2, INTS1, GGT1, LPAR1, AQP3, BAK1, PLOD1, CH25H, WNK4, CREB3L1, APOO, GATM, PTPRF, COLEC12, TMEM27, AADAC, CWH43, RPS19, RHCG, PDGFRA, SURF4, HSD11B1, CYP2D26, TMEM229A, KCNJ1, RPS26, GCNT1, TYROBP, MKI67, NUF2, CELSR2, TMEM110, GAS2, HGF, RPS5, CYP4B1, GPR153, ADAP2, NIPSNAP1, TMEM119, PDZK1, KCNJ16, CYP2J5, KCNJ15, SLC16A14, SLC15A2, MARCKSL1, AP2S1, LRRC…	427	6998	19662	1.32258	0.000226514	2.26537e-05	0.000986814
GOTERM_CC_DIRECT	GO:0005789~endoplasmic reticulum membrane	37	8.2774	2.26101e-06	HSD3B2, CYP2J5, MMP23, TMEM178, TMEM173, PTGIS, TMEM174, ACSL1, HMOX1, CH25H, ALOX5AP, GPSM1, ELOVL7, APOO, HPD, DHCR24, NOX4, KDELR3, NAT8, HPN, CKAP4, TMEM110, KRTCAP2, POR, CYP4B1, AADAC, SLC17A3, SURF4, HSD11B1, CYP2D26, PTGFRN, DIO1, STBD1, TMEM119, FKBP10, SLC27A2, SSR2	427	710	19662	2.39962	0.000696151	6.33065e-05	0.00303348
GOTERM_CC_DIRECT	GO:0005783~endoplasmic reticulum	55	12.3043	5.26731e-06	CYP2J5, MMP23, DSE, TMEM178, BAK1, TMEM173, PTGIS, MCTP2, TMEM174, PLOD1, HMOX1, CH25H, CREB3L1, ELOVL7, KCNQ1, APOO, DHCR24, HPD, KDELR3, CRTAP, KRTCAP2, POR, PROC, AADAC, G6PC, TXNDC5, SURF4, HSD11B1, CYP2D26, HSD11B2, PTGFRN, COL1A1, FKBP10, STBD1, SLC27A2, HSD3B2, ESYT2, ACSL1, ALOX5AP, GPSM1, NOX4, NAT8, COL4A3, GABARAPL1, CUBN, CKAP4, TMEM110, MAN1C1, CYP4B1, UGT2B38, DIO1, TMEM119, RCN3, L…	427	1323	19662	1.91427	0.00162102	0.000135185	0.00706673
GOTERM_CC_DIRECT	GO:0005903~brush border	10	2.23714	4.2398e-05	ACTR3, MYO6, CUBN, FOLR1, SLC5A1, SLC2A2, SLC34A1, RGS19, ENPEP, LRP2	427	77	19662	5.98011	0.012974	0.00100402	0.056869
GOTERM_CC_DIRECT	GO:0005615~extracellular space	57	12.7517	4.83773e-05	FGF9, POSTN, GGT1, MMP3, TTR, OGN, PTGIS, PPP1R1A, TGFBI, LBP, LOX, LOXL1, SPON1, KNG1, CLCA1, ACTA2, CRTAP, CTSS, SLIT3, PROC, PRELP, CTSK, COL1A2, VCAN, COL1A1, ADAMTS4, COL3A1, CCL9, 1500015O10RIK, UMOD, PF4, IL33, CCL6, TIMP1, PRSS8, COL6A3, COL6A2, EGF, DEFB1, GCNT1, CAR2, B4GALT1, LYZ2, LYZ1, KL, LGALS1, PM20D1, COL15A1, HGF, KLK1, CELA1, TINAG, LCN2, COL14A1, SRPX2, CXCL14, LRP2	427	1504	19662	1.74513	0.0147901	0.00106376	0.0648866
GOTERM_CC_DIRECT	GO:1903561~extracellular vesicle	7	1.566	0.000634979	OGN, ATP1B1, OLFML3, GPM6A, COL6A3, COL6A2, PRELP	427	49	19662	6.57812	0.177688	0.0129577	0.848578
GOTERM_CC_DIRECT	GO:0005777~peroxisome	10	2.23714	0.00223385	TMEM173, ACSL1, VIM, HAO2, DAO, PHYH, ACAA1B, SLC27A2, PIPOX, ACOT3	427	131	19662	3.51503	0.49782	0.0421363	2.95587
GOTERM_CC_DIRECT	GO:0005925~focal adhesion	19	4.25056	0.0023278	RPL18, NOX4, RPL19, VIM, LMO7, FBLIM1, ITGB5, RPLP2, FZD2, ARHGAP24, RPS5, TPM4, ACTR3, RPS19, RPL7, ITGB6, IRF2, GRB7, RHOG	427	391	19662	2.23757	0.512176	0.0413445	3.07839
GOTERM_CC_DIRECT	GO:0005902~microvillus	7	1.566	0.00609269	LYZ2, LYZ1, CLCA1, MYO6, MYO7A, PDGFRA, CAR2	427	76	19662	4.24116	0.847759	0.0992897	7.8722
GOTERM_CC_DIRECT	GO:0005587~collagen type IV trimer	3	0.671141	0.00663081	COL4A4, COL4A3, COL4A5	427	6	19662	23.0234	0.871148	0.102235	8.53917
GOTERM_CC_DIRECT	GO:0005887~integral component of plasma membrane	38	8.50112	0.00778756	KCNJ16, SLC5A2, KCNJ15, SLC6A20B, SLC15A2, SLC5A1, SLC7A9, GGT1, LPAR1, SLC26A1, FXYD5, ESYT2, AQP3, KCNJ1, EPCAM, SLC4A1, SLC4A4, CLEC2H, KCNQ1, SLC22A2, TMEM45A, SLC22A1, HPN, PTGER3, KL, SLC22A8, SLCO2B1, SLC6A19, SLC7A12, SLC26A4, FOLH1, RHCG, SLC16A7, SLC17A3, SLC17A1, PDGFRA, SLC13A1, SLC5A12	427	1126	19662	1.55398	0.910001	0.113432	9.9578
GOTERM_CC_DIRECT	GO:0005829~cytosol	54	12.0805	0.0118418	BACH1, S100A6, MYO7A, WWC1, RASSF9, PGAM2, MMP3, CALB1, RAB3IP, ACOT3, MTHFD1, FAHD1, BAK1, EIF4EBP1, NANS, HMOX1, SLC2A2, WNK4, TUBB5, DAO, DHCR24, SOCS3, FBP1, CDO1, PPARGC1A, RPS19, MAD2L1, HNF4A, UROC1, KPNA2, ALDOB, VIM, ALDH1A2, VDR, ALOX5AP, GPSM1, HAAO, NDRG1, PRKAA2, RANBP3L, CAR2, GABARAPL1, SLC12A3, LGALS1, CIDEB, BIRC5, AKR1C21, CRYZ, INMT, PCK1, LCN2, ADAP2, GRB7, NNMT	427	1784	19662	1.39379	0.974499	0.160304	14.7707
GOTERM_CC_DIRECT	GO:0045177~apical part of cell	8	1.78971	0.0126489	PARD6B, MYO6, CUBN, HSD11B1, UMOD, ENPEP, LRP2, CAR2	427	115	19662	3.20326	0.980173	0.163236	15.6999
GOTERM_CC_DIRECT	GO:0043231~intracellular membrane-bounded organelle	27	6.04027	0.0131912	CYP2J5, LITAF, CYP2C44, ALDOB, IFI30, AASS, UGT3A1, UGT3A2, VDR, ACSL1, HMOX1, ABCA13, COL4A3, MYO6, PTPRF, CTSS, POR, CYP4B1, UGT2B38, AADAC, G6PC, UGT2B34, HSD11B1, HSD11B2, CYP2D26, VCAN, SLC27A2	427	751	19662	1.65548	0.983259	0.162909	16.319
GOTERM_CC_DIRECT	GO:0009986~cell surface	23	5.14541	0.0190082	B4GALT1, HPN, PTGER3, SLC12A1, CKAP4, LGALS1, SLC34A1, ITGB5, CTSS, LPAR1, EPCAM, FOLH1, EGFLAM, SRPX2, FOLR1, PDGFRA, VCAN, ANTXR2, LBP, PTGFRN, SLC4A1, CAR4, TYROBP	427	629	19662	1.68375	0.99729	0.218302	22.7004
GOTERM_CC_DIRECT	GO:0031988~membrane-bounded vesicle	3	0.671141	0.0311963	SLC34A1, GGT1, SLC47A1	427	13	19662	10.6262	0.999942	0.323255	34.6372
GOTERM_CC_DIRECT	GO:0005584~collagen type I trimer	2	0.447427	0.042864	COL1A2, COL1A1	427	2	19662	46.0468	0.999999	0.404871	44.4441
GOTERM_CC_DIRECT	GO:0042383~sarcolemma	7	1.566	0.0435158	LAMA2, ATP1B1, COL6A3, COL6A2, COL6A1, CAR4, KCNQ1	427	118	19662	2.73159	0.999999	0.398017	44.9495
GOTERM_CC_DIRECT	GO:0048471~perinuclear region of cytoplasm	23	5.14541	0.0483021	NOX4, S100A6, MYO6, PKHD1, CKAP4, ALDOB, VIM, SLC34A1, WWC1, CIDEB, CDC20, RAB3IP, ACTR3, VDR, ALDH1A2, TMEM173, MAD2L1, SLC17A3, HMOX1, NDRG1, CAR4, STBD1, MYC	427	692	19662	1.53046	1	0.419917	48.5328
GOTERM_CC_DIRECT	GO:0005614~interstitial matrix	3	0.671141	0.0514002	SMOC2, EGFLAM, COL14A1	427	17	19662	8.12591	1	0.42904	50.7358
GOTERM_CC_DIRECT	GO:0043234~protein complex	21	4.69799	0.0560495	PARD6B, CCM2, CUBN, MYO6, ACTA2, WWC1, CDC20, PF4, KLK1, MMP3, TTR, EIF4EBP1, PVALB, PDGFRA, COL6A2, TUBB5, COL6A1, PRKAA2, LRP2, MYC, SPP2	427	628	19662	1.53978	1	0.446889	53.8786
GOTERM_CC_DIRECT	GO:0005605~basal lamina	3	0.671141	0.062835	COL4A4, LAMA2, COL4A5	427	19	19662	7.27055	1	0.475218	58.1335
GOTERM_CC_DIRECT	GO:0044297~cell body	6	1.34228	0.0709268	GABARAPL1, ACTA2, VIM, TUBB5, MMP3, CALB1	427	102	19662	2.70864	1	0.507416	62.7319
GOTERM_CC_DIRECT	GO:0005788~endoplasmic reticulum lumen	6	1.34228	0.0756957	LYZ2, LYZ1, TXNDC5, RCN3, FKBP10, SLC27A2	427	104	19662	2.65655	1	0.520333	65.2182
GOTERM_CC_DIRECT	GO:0031262~Ndc80 complex	2	0.447427	0.0838948	SPC24, NUF2	427	4	19662	23.0234	1	0.547863	69.1372
GOTERM_CC_DIRECT	GO:0005794~Golgi apparatus	34	7.60626	0.0865876	ARFGAP1, FUT9, LITAF, UMOD, POSTN, DSE, RAB3IP, ST6GALNAC5, TMEM173, CHST14, GPSM1, LEPROT, GCNT1, CCNA2, ALX1, DHCR24, HPD, APOO, B4GALT1, NAT8, GABARAPL1, CUBN, MYO6, PKDCC, CHPT1, MAN1C1, PROC, RAB31, CXCL14, SURF4, PTGFRN, COL1A1, CAR4, LRP2	427	1190	19662	1.31562	1	0.54932	70.3324
GOTERM_CC_DIRECT	GO:0005680~anaphase-promoting complex	3	0.671141	0.0945737	ANAPC2, CDC20, UBE2C	427	24	19662	5.75585	1	0.572581	73.6298
GOTERM_CC_DIRECT	GO:0000139~Golgi membrane	14	3.13199	0.0999736	ARFGAP1, FUT9, MAN1C1, CHPT1, ST6GALNAC5, ACTR3, SURF4, GPSM1, CHST14, LEPROT, GCNT1, APOO, DHCR24, HPD	427	403	19662	1.59964	1	0.583892	75.6635
GOTERM_MF_DIRECT	GO:0016491~oxidoreductase activity	43	9.61969	7.65933e-11	ALDH8A1, HSD3B2, CYP2J5, LDHB, SORD, ADHFE1, IFI30, AASS, PAH, PIPOX, MTHFD1, ALDH1A2, PLOD1, HMOX1, CH25H, MIOX, BC089597, HAAO, BDH2, DAO, LOX, LOXL1, HPD, DHCR24, NOX4, ALDH6A1, PTGR1, HGD, AKR1C21, CDO1, CRYZ, PHYH, POR, CYP4B1, IYD, KDM2B, L2HGDH, RRM2, HAO2, HSD11B1, CYP2D26, HSD11B2, DIO1	392	604	17446	3.16841	5.45344e-08	5.45344e-08	1.1577e-07
GOTERM_MF_DIRECT	GO:0015293~symporter activity	15	3.3557	2.09652e-07	SLC16A14, SLC5A2, SLC12A1, SLC6A20B, SLC15A2, SLC12A3, SLC5A1, SLC34A1, SLC6A19, SLC16A7, SLC17A1, SLC13A1, SLC4A4, SLC1A1, SLC5A12	392	112	17446	5.9605	0.000149261	7.46335e-05	0.000316888
GOTERM_MF_DIRECT	GO:0005201~extracellular matrix structural constituent	9	2.01342	2.96375e-06	COL4A4, COL4A3, COL3A1, COL1A2, VCAN, COL1A1, COL5A1, COL4A5, PRELP	392	41	17446	9.76941	0.00210797	0.00070315	0.00447959
GOTERM_MF_DIRECT	GO:0048407~platelet-derived growth factor binding	6	1.34228	3.83461e-06	COL3A1, COL1A2, PDGFRA, COL6A1, COL1A1, COL5A1	392	12	17446	22.2526	0.00272652	0.000682329	0.00579582
GOTERM_MF_DIRECT	GO:0003824~catalytic activity	29	6.4877	4.04519e-06	HSD3B2, LDHB, ALDOB, HINT2, PGAM2, ECHDC2, AASS, PAH, ACAT1, FAHD1, MTHFD1, MUT, ACSL1, MCCC1, ACAA1B, PAPSS2, DHCR24, AADAT, LYZ2, LYZ1, FBP1, PHYH, ACSM2, ACSM1, FOLH1, HAO2, AGXT2, SLC27A2, ACSM5	392	479	17446	2.69446	0.00287604	0.000575871	0.00611411
GOTERM_MF_DIRECT	GO:0005215~transporter activity	17	3.80313	3.23751e-05	SLC5A2, SLC12A1, SLC6A20B, SLC15A2, SLC12A3, SLC5A1, SLCO2B1, AQP3, LCN2, SLC2A2, SLC13A1, SLC4A1, SLC4A4, SLC22A2, ABCA13, SLC5A12, SLC22A1	392	217	17446	3.48657	0.0227878	0.00383454	0.0489236
GOTERM_MF_DIRECT	GO:0048037~cofactor binding	5	1.11857	0.000469126	PGAM2, PAH, BIRC5, DAO, PHYH	392	17	17446	13.0897	0.284015	0.0466069	0.706737
GOTERM_MF_DIRECT	GO:0005506~iron ion binding	14	3.13199	0.00102014	CYP2J5, CYP2C44, CYP2D12, PAH, CDO1, CYP4B1, LCN2, PTGIS, PLOD1, CH25H, CYP2J11, MIOX, HAAO, CYP2D26	392	212	17446	2.93902	0.516505	0.0868355	1.53089
GOTERM_MF_DIRECT	GO:0008201~heparin binding	11	2.46085	0.00217327	OGN, SMOC2, PTPRF, FGF9, CRISPLD2, LXN, PF4, POSTN, COL5A1, SLIT3, PRELP	392	151	17446	3.24209	0.787551	0.158119	3.23497
GOTERM_MF_DIRECT	GO:0008237~metallopeptidase activity	11	2.46085	0.00330793	FOLH1, CLCA1, ADAMTSL2, MMP19, MEP1A, ENPEP, ADAMTS12, MMP3, MMP23, TMEM27, ADAMTS4	392	160	17446	3.05973	0.905499	0.210152	4.88486
GOTERM_MF_DIRECT	GO:0005509~calcium ion binding	28	6.26398	0.00433387	S100A6, UMOD, ESYT2, MMP3, CALB1, SMOC2, EFHD1, CGREF1, MCTP2, PVALB, SLC25A24, EGF, MATN2, CUBN, SVEP1, MMP19, CELSR2, MAN1C1, PROC, SLIT3, EGFLAM, CDH16, NINL, S100G, VCAN, RCN3, FKBP10, LRP2	392	699	17446	1.78275	0.954608	0.245069	6.354
GOTERM_MF_DIRECT	GO:0015645~fatty acid ligase activity	3	0.671141	0.00479067	ACSM2, ACSM1, ACSM5	392	5	17446	26.7031	0.96726	0.247933	7.00129
GOTERM_MF_DIRECT	GO:0003996~acyl-CoA ligase activity	3	0.671141	0.00479067	ACSM2, ACSM1, ACSM5	392	5	17446	26.7031	0.96726	0.247933	7.00129
GOTERM_MF_DIRECT	GO:0005499~vitamin D binding	3	0.671141	0.00707976	VDR, S100G, CALB1	392	6	17446	22.2526	0.993646	0.322355	10.1825
GOTERM_MF_DIRECT	GO:0015651~quaternary ammonium group transmembrane transporter activity	3	0.671141	0.00707976	SLC22A8, SLC22A2, SLC22A1	392	6	17446	22.2526	0.993646	0.322355	10.1825
GOTERM_MF_DIRECT	GO:0047760~butyrate-CoA ligase activity	3	0.671141	0.00707976	ACSM2, ACSM1, ACSM5	392	6	17446	22.2526	0.993646	0.322355	10.1825
GOTERM_MF_DIRECT	GO:0004321~fatty-acyl-CoA synthase activity	3	0.671141	0.00707976	ACSM2, ACSM1, ACSM5	392	6	17446	22.2526	0.993646	0.322355	10.1825
GOTERM_MF_DIRECT	GO:0008395~steroid hydroxylase activity	6	1.34228	0.00708612	CYP2J5, CYP2C44, CH25H, CYP2D12, CYP2J11, CYP2D26	392	54	17446	4.94501	0.993675	0.303483	10.1912
GOTERM_MF_DIRECT	GO:0042802~identical protein binding	25	5.59284	0.00753316	LDHB, LYZ2, LYZ1, CUBN, SORD, ACY3, PCBD1, VIM, ALDOB, FBP1, CIDEB, BIRC5, ESYT2, EMILIN1, TTR, BAK1, TMEM173, MAD2L1, SRPX2, COL1A2, CLDN2, AGXT2, COL1A1, GRB7, TYROBP	392	625	17446	1.7802	0.99541	0.301575	10.8004
GOTERM_MF_DIRECT	GO:0051213~dioxygenase activity	7	1.566	0.00910479	KDM2B, PLOD1, HAAO, HGD, CDO1, PHYH, HPD	392	80	17446	3.8942	0.998515	0.334368	12.9118
GOTERM_MF_DIRECT	GO:0005436~sodium:phosphate symporter activity	3	0.671141	0.0097654	SLC17A3, SLC17A1, SLC34A1	392	7	17446	19.0736	0.999076	0.337019	13.7852
GOTERM_MF_DIRECT	GO:0004497~monooxygenase activity	8	1.78971	0.0108493	CYP2J5, PTGIS, CYP2C44, CH25H, CYP2D12, CYP2D26, PAH, CYP4B1	392	108	17446	3.29667	0.999576	0.350462	15.2006
GOTERM_MF_DIRECT	GO:0015108~chloride transmembrane transporter activity	3	0.671141	0.0128288	SLC26A4, SLC4A1, SLC26A1	392	8	17446	16.6894	0.999898	0.383595	17.7297
GOTERM_MF_DIRECT	GO:0043394~proteoglycan binding	3	0.671141	0.0128288	CTSK, CTSS, COL5A1	392	8	17446	16.6894	0.999898	0.383595	17.7297
GOTERM_MF_DIRECT	GO:0015321~sodium-dependent phosphate transmembrane transporter activity	3	0.671141	0.0128288	SLC17A3, SLC17A1, SLC34A1	392	8	17446	16.6894	0.999898	0.383595	17.7297
GOTERM_MF_DIRECT	GO:0016829~lyase activity	9	2.01342	0.0131404	FAHD1, PCBD1, ALDOB, CAR12, ECHDC2, UROC1, CAR4, CAR2, PCK1	392	139	17446	2.88163	0.999919	0.37556	18.1215
GOTERM_MF_DIRECT	GO:0016712~oxidoreductase activity, acting on paired donors, with incorporation or reduction of molecular oxygen, reduced flavin or flavoprotein as one donor, and incorporation of one atom of oxygen	5	1.11857	0.0142189	CYP2J5, CYP2C44, CYP2D12, CYP2J11, CYP2D26	392	42	17446	5.29823	0.999963	0.384641	19.4636
GOTERM_MF_DIRECT	GO:0016853~isomerase activity	8	1.78971	0.014947	HSD3B2, MUT, ISYNA1, PTGIS, TXNDC5, PGAM2, FKBP10, DSE	392	115	17446	3.09601	0.999978	0.385773	20.358
GOTERM_MF_DIRECT	GO:0005496~steroid binding	5	1.11857	0.016656	HSD11B1, ESRRG, HSD11B2, PAQR9, SLC22A2	392	44	17446	5.0574	0.999994	0.405452	22.421
GOTERM_MF_DIRECT	GO:0008392~arachidonic acid epoxygenase activity	5	1.11857	0.0207752	CYP2J5, CYP2C44, CYP2D12, CYP2J11, CYP2D26	392	47	17446	4.73459	1	0.463571	27.1904
GOTERM_MF_DIRECT	GO:0042803~protein homodimerization activity	28	6.26398	0.0219478	S100A6, MYO7A, PAH, ACAT1, BAK1, TMEM173, RPL7, PVALB, OXCT1, ALOX5AP, HMOX1, SLC4A1, KCNQ1, ALX1, SLC22A1, AADAT, CEBPB, CUBN, LGALS1, SLC34A1, BIRC5, ECT2, LCN2, C1QB, MAD2L1, RPS19, HNF4A, PDGFRA	392	798	17446	1.56158	1	0.468492	28.4973
GOTERM_MF_DIRECT	GO:0008233~peptidase activity	20	4.47427	0.0239123	HPN, CLCA1, ADAMTSL2, PM20D1, MMP19, GGT1, CTSS, ENPEP, KLK1, CELA1, MMP23, MMP3, PROC, PRSS8, FOLH1, CTSK, MEP1A, ADAMTS12, HTRA3, ADAMTS4	392	516	17446	1.725	1	0.484586	30.6375
GOTERM_MF_DIRECT	GO:0016705~oxidoreductase activity, acting on paired donors, with incorporation or reduction of molecular oxygen	7	1.566	0.023921	CYP2J5, PTGIS, PLOD1, CYP2C44, CYP2D12, CYP2D26, CYP4B1	392	99	17446	3.14683	1	0.471901	30.6468
GOTERM_MF_DIRECT	GO:0046872~metal ion binding	92	20.5817	0.0254163	CYP2J5, S100A6, PDLIM4, NT5DC2, POSTN, ENPEP, MMP23, MMP3, CALB1, FAHD1, PTER, EFHD1, BAK1, CGREF1, PTGIS, PLOD1, PVALB, SLC25A24, MCCC1, CH25H, HMOX1, MIOX, LOX, BPNT1, LOXL1, HPD, SPON1, EGR2, CLCA1, NUDT4, MMP19, CAR12, FBP1, FBLIM1, COLEC12, CDO1, CHPT1, FOLH1, KDM2B, HNF4A, RRM2, COL1A2, CYP2D26, COL1A1, RNF26, CAR4, FKBP10, ADAMTS4, ARFGAP1, SORD, ADHFE1, COL3A1, PAH, ESYT2, ACAT1, TPM4, TI…	392	3355	17446	1.22041	1	0.480379	32.2355
GOTERM_MF_DIRECT	GO:0001968~fibronectin binding	4	0.894855	0.0265256	CTSK, MFAP2, CTSS, IGFBP5	392	29	17446	6.13863	1	0.48317	33.392
GOTERM_MF_DIRECT	GO:0015020~glucuronosyltransferase activity	4	0.894855	0.0265256	UGT2B38, UGT2B34, UGT3A1, UGT3A2	392	29	17446	6.13863	1	0.48317	33.392
GOTERM_MF_DIRECT	GO:0008271~secondary active sulfate transmembrane transporter activity	3	0.671141	0.0285047	SLC26A4, SLC13A1, SLC26A1	392	12	17446	11.1263	1	0.496586	35.4098
GOTERM_MF_DIRECT	GO:0005200~structural constituent of cytoskeleton	6	1.34228	0.0307222	ACTR3, VIM, TUBB5, TUBB6, ARPC4, TPM2	392	78	17446	3.42347	1	0.511632	37.6026
GOTERM_MF_DIRECT	GO:0015175~neutral amino acid transmembrane transporter activity	3	0.671141	0.0381647	SLC7A9, SLC6A19, SLC7A12	392	14	17446	9.53681	1	0.579283	44.4648
GOTERM_MF_DIRECT	GO:0015106~bicarbonate transmembrane transporter activity	3	0.671141	0.0381647	SLC26A4, SLC4A1, SLC26A1	392	14	17446	9.53681	1	0.579283	44.4648
GOTERM_MF_DIRECT	GO:0004089~carbonate dehydratase activity	3	0.671141	0.0433963	CAR12, CAR4, CAR2	392	15	17446	8.90102	1	0.616046	48.8593
GOTERM_MF_DIRECT	GO:0003845~11-beta-hydroxysteroid dehydrogenase [NAD(P)] activity	2	0.447427	0.044323	HSD11B1, HSD11B2	392	2	17446	44.5051	1	0.613017	49.603
GOTERM_MF_DIRECT	GO:0030023~extracellular matrix constituent conferring elasticity	2	0.447427	0.044323	MFAP5, EMILIN1	392	2	17446	44.5051	1	0.613017	49.603
GOTERM_MF_DIRECT	GO:0008194~UDP-glycosyltransferase activity	2	0.447427	0.044323	UGT3A1, UGT3A2	392	2	17446	44.5051	1	0.613017	49.603
GOTERM_MF_DIRECT	GO:0050661~NADP binding	4	0.894855	0.0564052	MIOX, HSD11B1, CRYZ, POR	392	39	17446	4.56463	1	0.693052	58.42
GOTERM_MF_DIRECT	GO:0004222~metalloendopeptidase activity	7	1.566	0.0585926	ADAMTSL2, MMP19, MEP1A, ADAMTS12, MMP3, MMP23, ADAMTS4	392	123	17446	2.53281	1	0.697044	59.8533
GOTERM_MF_DIRECT	GO:0000979~RNA polymerase II core promoter sequence-specific DNA binding	5	1.11857	0.063339	KDM2B, CEBPB, HNF4A, PAX8, MYC	392	67	17446	3.32128	1	0.716107	62.8062
GOTERM_MF_DIRECT	GO:0004505~phenylalanine 4-monooxygenase activity	2	0.447427	0.0657441	PCBD1, PAH	392	3	17446	29.6701	1	0.720344	64.2239
GOTERM_MF_DIRECT	GO:0016701~oxidoreductase activity, acting on single donors with incorporation of molecular oxygen	2	0.447427	0.0657441	MIOX, HPD	392	3	17446	29.6701	1	0.720344	64.2239
GOTERM_MF_DIRECT	GO:0004029~aldehyde dehydrogenase (NAD) activity	3	0.671141	0.0666738	ALDH8A1, ALDH1A2, ALDH6A1	392	19	17446	7.02712	1	0.716262	64.7582
GOTERM_MF_DIRECT	GO:0015301~anion:anion antiporter activity	3	0.671141	0.0666738	SLC26A4, SLC4A1, SLC26A1	392	19	17446	7.02712	1	0.716262	64.7582
GOTERM_MF_DIRECT	GO:0008509~anion transmembrane transporter activity	3	0.671141	0.0666738	SLC26A4, SLC4A1, SLC4A4	392	19	17446	7.02712	1	0.716262	64.7582
GOTERM_MF_DIRECT	GO:0005242~inward rectifier potassium channel activity	3	0.671141	0.0730161	KCNJ16, KCNJ15, KCNJ1	392	20	17446	6.67577	1	0.740651	68.2094
GOTERM_MF_DIRECT	GO:0005539~glycosaminoglycan binding	3	0.671141	0.0795431	SMOC2, EGFLAM, CRISPLD2	392	21	17446	6.35787	1	0.762923	71.4297
GOTERM_MF_DIRECT	GO:0005452~inorganic anion exchanger activity	3	0.671141	0.0795431	SLC22A8, SLC4A1, SLC4A4	392	21	17446	6.35787	1	0.762923	71.4297
GOTERM_MF_DIRECT	GO:0022857~transmembrane transporter activity	4	0.894855	0.083734	SLC2A2, SLC22A8, SLC22A2, SLC22A1	392	46	17446	3.87001	1	0.772922	73.334
GOTERM_MF_DIRECT	GO:0008514~organic anion transmembrane transporter activity	3	0.671141	0.0862435	SLC17A3, SLC22A8, SLCO2B1	392	22	17446	6.06888	1	0.775392	74.4167
GOTERM_MF_DIRECT	GO:0005329~dopamine transmembrane transporter activity	2	0.447427	0.0866862	SLC22A2, SLC22A1	392	4	17446	22.2526	1	0.769453	74.6035
GOTERM_MF_DIRECT	GO:0047961~glycine N-acyltransferase activity	2	0.447427	0.0866862	GLYAT, KEG1	392	4	17446	22.2526	1	0.769453	74.6035
GOTERM_MF_DIRECT	GO:0008009~chemokine activity	4	0.894855	0.0924101	CXCL14, CCL9, PF4, CCL6	392	48	17446	3.70876	1	0.784364	76.9057
GOTERM_MF_DIRECT	GO:0071837~HMG box domain binding	3	0.671141	0.0931062	EGR2, PRRX1, POU3F3	392	23	17446	5.80501	1	0.779683	77.172
GOTERM_MF_DIRECT	GO:0020037~heme binding	8	1.78971	0.0992985	CYP2J5, PTGIS, CYP2C44, HMOX1, CYP2D12, CYP2J11, CYP2D26, CYP4B1	392	175	17446	2.03452	1	0.794908	79.4177
GOTERM_MF_DIRECT	GO:0016787~hydrolase activity	43	9.61969	0.0996771	GLB1L, HINT2, PGAM2, NTAN1, ABHD3, GGT1, ENPEP, MMP23, MMP3, ACOT3, PTER, FAHD1, MTHFD1, PRSS8, ADAMTS12, HTRA3, BPNT1, LYZ2, HPN, PTPN9, LYZ1, CLCA1, NUDT4, PTPRF, ACY3, RNASE4, KL, PM20D1, MMP19, FBP1, CTSS, KLK1, CELA1, LACTB2, POR, PROC, AADAC, DNASE1, CTSK, G6PC, FOLH1, MEP1A, ADAMTS4	392	1533	17446	1.24835	1	0.789343	79.5481
KEGG_PATHWAY	mmu04974:Protein digestion and absorption	18	4.02685	3.38026e-10	COL4A4, COL4A3, ATP1B1, COL3A1, COL15A1, SLC7A9, SLC6A19, COL5A1, COL4A5, COL14A1, COL6A3, MEP1A, COL6A2, COL1A2, COL6A1, COL1A1, KCNQ1, SLC1A1	222	88	7691	7.0863	7.707e-08	7.707e-08	4.3276e-07
KEGG_PATHWAY	mmu04512:ECM-receptor interaction	13	2.90828	7.02859e-06	COL4A4, COL4A3, COL3A1, ITGB5, COL5A1, COL4A5, LAMA2, ITGB6, COL6A3, COL6A2, COL1A2, COL6A1, COL1A1	222	88	7691	5.11788	0.00160124	0.000800941	0.008998
KEGG_PATHWAY	mmu01100:Metabolic pathways	63	14.094	8.33292e-06	CYP2J5, LDHB, SEPHS2, PGAM2, GGT1, DSE, ACOT3, ST6GALNAC5, MTHFD1, FAHD1, PTGIS, NANS, MCCC1, CYP2J11, DAO, BPNT1, HPD, DHCR24, AADAT, ALDH6A1, GATM, FBP1, CDO1, CHPT1, G6PC, FOLH1, RRM2, MGAM, HAO2, HSD11B1, UROC1, XYLB, HSD3B2, FUT9, SORD, CYP2C44, ALDOB, AASS, PAH, ACAT1, PIPOX, ALDH1A2, MUT, ISYNA1, ACSL1, HAAO, BDH2, GCNT1, ACAA1B, PAPSS2, B4GALT1, KL, HGD, MAN1C1, PCK1, KHK, UGT2B38, ACSM2,…	222	1269	7691	1.71992	0.00189811	0.000633104	0.0106677
KEGG_PATHWAY	mmu04151:PI3K-Akt signaling pathway	26	5.81655	2.2729e-05	FGF9, COL3A1, ITGB5, LPAR1, EIF4EBP1, ITGB6, COL6A3, COL6A2, CREB3L1, COL6A1, PRKAA2, EGF, MYC, COL4A4, COL4A3, SGK2, HGF, COL5A1, COL4A5, PCK1, LAMA2, G6PC, GNG10, PDGFRA, COL1A2, COL1A1	222	351	7691	2.56623	0.00516887	0.00129473	0.029095
KEGG_PATHWAY	mmu00650:Butanoate metabolism	7	1.566	9.38534e-05	ACSM2, ACSM1, L2HGDH, OXCT1, BDH2, ACAT1, ACSM5	222	27	7691	8.98182	0.0211722	0.00427077	0.12009
KEGG_PATHWAY	mmu04978:Mineral absorption	7	1.566	0.000775688	VDR, ATP1B1, SLC5A1, HMOX1, S100G, SLC40A1, SLC6A19	222	39	7691	6.21818	0.162158	0.0290571	0.988544
KEGG_PATHWAY	mmu04510:Focal adhesion	16	3.57942	0.000879063	COL4A4, COL4A3, COL3A1, ITGB5, HGF, COL5A1, COL4A5, LAMA2, ITGB6, COL6A3, PDGFRA, COL6A2, COL1A2, COL6A1, COL1A1, EGF	222	207	7691	2.67781	0.18169	0.0282386	1.1196
KEGG_PATHWAY	mmu04964:Proximal tubule bicarbonate reclamation	5	1.11857	0.00322944	ATP1B1, SLC4A4, CAR4, CAR2, PCK1	222	22	7691	7.87367	0.521693	0.0880662	4.05661
KEGG_PATHWAY	mmu01130:Biosynthesis of antibiotics	14	3.13199	0.00858527	AADAT, LDHB, ALDOB, FBP1, AASS, PGAM2, ACAT1, PCK1, ISYNA1, HAO2, DAO, PAPSS2, ACAA1B, BPNT1	222	214	7691	2.26644	0.859969	0.196222	10.4513
KEGG_PATHWAY	mmu00140:Steroid hormone biosynthesis	8	1.78971	0.0122859	UGT2B38, HSD3B2, UGT2B34, CYP2C44, CYP2D12, HSD11B1, CYP2D26, HSD11B2	222	87	7691	3.18567	0.940306	0.245615	14.6376
KEGG_PATHWAY	mmu04931:Insulin resistance	9	2.01342	0.0136358	G6PC, PTPRF, SOCS3, SLC2A2, CREB3L1, PRKAA2, PPARGC1A, SLC27A2, PCK1	222	110	7691	2.83452	0.956298	0.247668	16.1193
KEGG_PATHWAY	mmu00040:Pentose and glucuronate interconversions	5	1.11857	0.0141269	UGT2B38, SORD, UGT2B34, KL, XYLB	222	33	7691	5.24911	0.960989	0.236869	16.6524
KEGG_PATHWAY	mmu04961:Endocrine and other factor-regulated calcium reabsorption	6	1.34228	0.0162562	VDR, ATP1B1, KL, AP2S1, KLK1, CALB1	222	52	7691	3.9974	0.976171	0.249827	18.9278
KEGG_PATHWAY	mmu00280:Valine, leucine and isoleucine degradation	6	1.34228	0.0203126	ALDH6A1, MUT, OXCT1, MCCC1, ACAT1, ACAA1B	222	55	7691	3.77936	0.990711	0.284098	23.1051
KEGG_PATHWAY	mmu04922:Glucagon signaling pathway	8	1.78971	0.024679	LDHB, G6PC, SLC2A2, PGAM2, CREB3L1, PRKAA2, PPARGC1A, PCK1	222	100	7691	2.77153	0.996645	0.316021	27.3792
KEGG_PATHWAY	mmu00260:Glycine, serine and threonine metabolism	5	1.11857	0.0270195	GATM, PGAM2, DAO, AGXT2, PIPOX	222	40	7691	4.33052	0.99806	0.323163	29.5789
KEGG_PATHWAY	mmu00360:Phenylalanine metabolism	4	0.894855	0.0271318	GLYAT, PAH, KEG1, HPD	222	23	7691	6.02507	0.998111	0.308514	29.6829
KEGG_PATHWAY	mmu04152:AMPK signaling pathway	9	2.01342	0.0308188	EIF4EBP1, G6PC, HNF4A, FBP1, CREB3L1, PRKAA2, PPARGC1A, CCNA2, PCK1	222	128	7691	2.43592	0.999205	0.327339	33.0194
KEGG_PATHWAY	mmu04973:Carbohydrate digestion and absorption	5	1.11857	0.0316651	ATP1B1, G6PC, SLC5A1, SLC2A2, MGAM	222	42	7691	4.1243	0.999349	0.320316	33.7644
KEGG_PATHWAY	mmu04146:Peroxisome	7	1.566	0.0317262	ACSL1, HAO2, DAO, PHYH, ACAA1B, SLC27A2, PIPOX	222	83	7691	2.9218	0.999358	0.307564	33.8178
KEGG_PATHWAY	mmu00072:Synthesis and degradation of ketone bodies	3	0.671141	0.0381107	OXCT1, BDH2, ACAT1	222	11	7691	9.4484	0.999858	0.344177	39.1923
KEGG_PATHWAY	mmu00010:Glycolysis / Gluconeogenesis	6	1.34228	0.0406075	LDHB, G6PC, ALDOB, FBP1, PGAM2, PCK1	222	66	7691	3.14947	0.999921	0.349247	41.1824
KEGG_PATHWAY	mmu00640:Propanoate metabolism	4	0.894855	0.0412285	LDHB, ALDH6A1, MUT, ACAT1	222	27	7691	5.13247	0.999932	0.341219	41.668
KEGG_PATHWAY	mmu04918:Thyroid hormone synthesis	6	1.34228	0.0502292	SLC26A4, ATP1B1, PAX8, CREB3L1, LRP2, IYD	222	70	7691	2.9695	0.999992	0.387115	48.3031
KEGG_PATHWAY	mmu05146:Amoebiasis	8	1.78971	0.0511252	COL4A4, LAMA2, COL4A3, COL3A1, COL1A2, COL1A1, COL5A1, COL4A5	222	117	7691	2.36883	0.999994	0.380352	48.9241
KEGG_PATHWAY	mmu04976:Bile secretion	6	1.34228	0.0528267	ATP1B1, SLC5A1, SLC22A8, SLC4A4, CAR2, SLC22A1	222	71	7691	2.92767	0.999996	0.378696	50.0843
KEGG_PATHWAY	mmu04971:Gastric acid secretion	6	1.34228	0.0555012	KCNJ16, KCNJ15, ATP1B1, KCNQ1, CAR2, KCNJ1	222	72	7691	2.88701	0.999998	0.382567	51.859
KEGG_PATHWAY	mmu04920:Adipocytokine signaling pathway	6	1.34228	0.0555012	G6PC, ACSL1, SOCS3, PRKAA2, PPARGC1A, PCK1	222	72	7691	2.88701	0.999998	0.382567	51.859
KEGG_PATHWAY	mmu00310:Lysine degradation	5	1.11857	0.0615304	AADAT, PLOD1, AASS, ACAT1, PIPOX	222	52	7691	3.33117	0.999999	0.403759	55.6485
KEGG_PATHWAY	mmu00051:Fructose and mannose metabolism	4	0.894855	0.0729946	KHK, SORD, ALDOB, FBP1	222	34	7691	4.07578	1	0.448941	62.1061
KEGG_PATHWAY	mmu00450:Selenocompound metabolism	3	0.671141	0.0842649	SEPHS2, PAPSS2, INMT	222	17	7691	6.11367	1	0.487787	67.5991
KEGG_PATHWAY	mmu00910:Nitrogen metabolism	3	0.671141	0.0842649	CAR12, CAR4, CAR2	222	17	7691	6.11367	1	0.487787	67.5991
KEGG_PATHWAY	mmu05222:Small cell lung cancer	6	1.34228	0.0935411	COL4A4, LAMA2, COL4A3, CKS1B, MYC, COL4A5	222	84	7691	2.47458	1	0.514374	71.5588
